# Supplementary figures and images for: Inhibition of autophagy with bafilomycin and chloroquine decreases mitochondrial quality and bioenergetic function in primary neurons
Source: PubMed Central journal article supplement — Redox Biol. 2016 Nov 18;11:73–81. doi: 10.1016/j.redox.2016.11.004 (PMC5124357; doi:10.1016/j.redox.2016.11.004), 2016-11-18

A

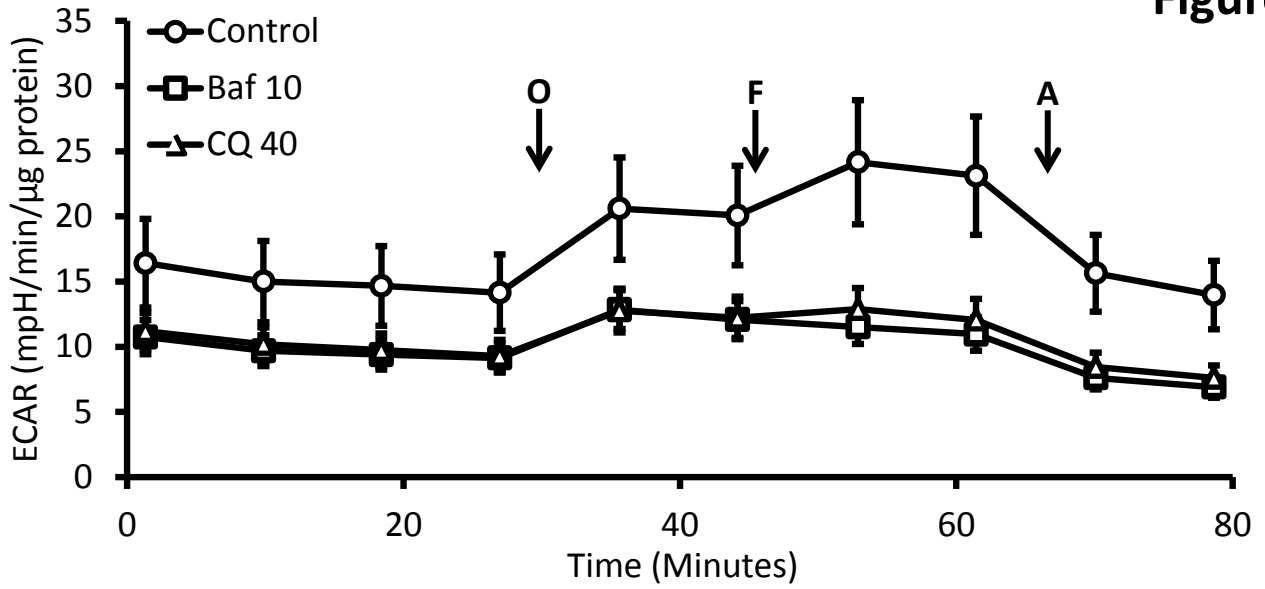

B

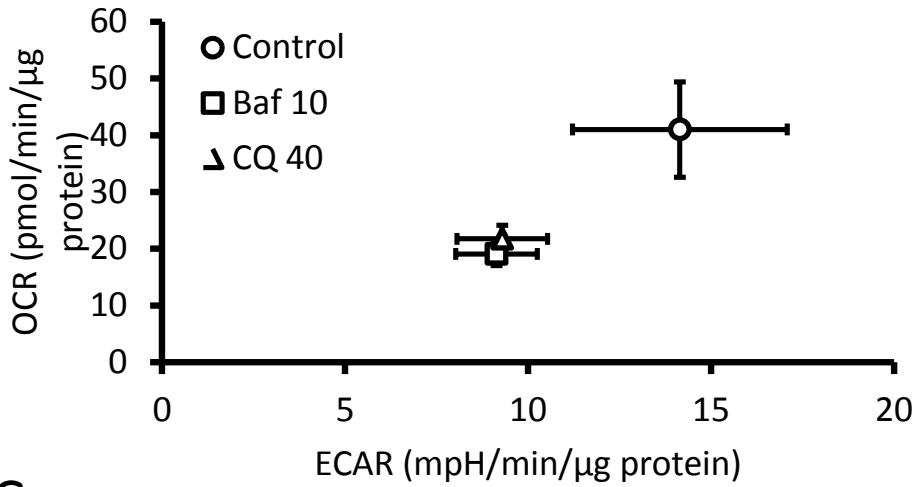

C

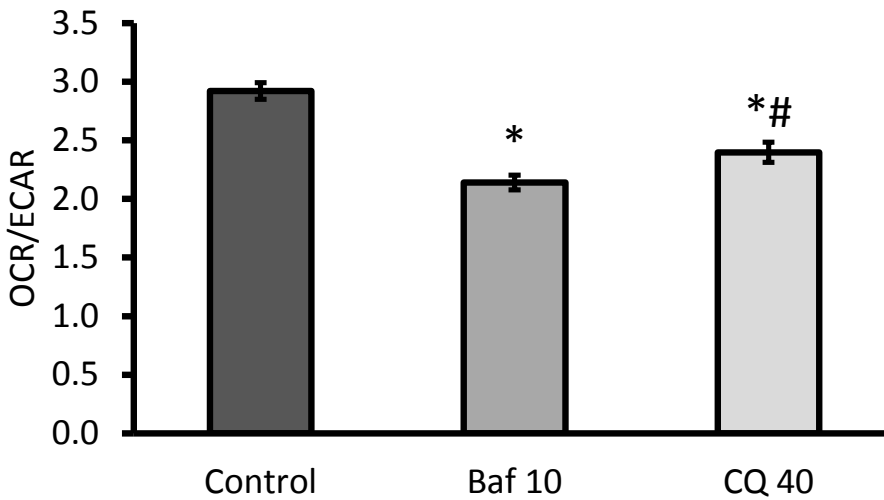

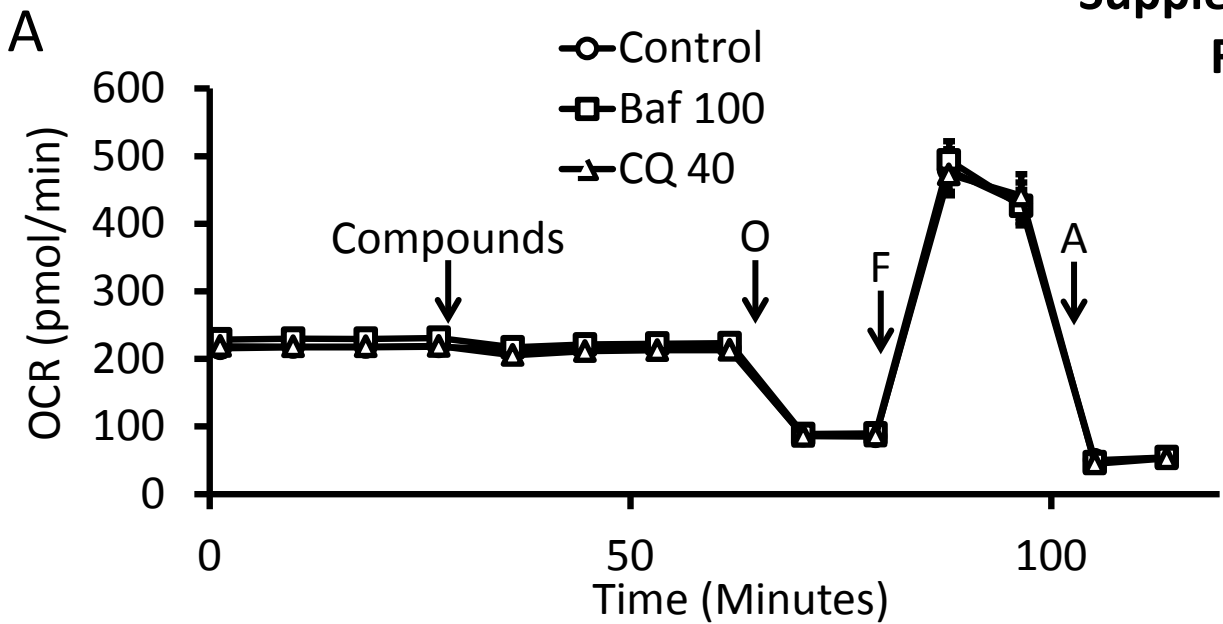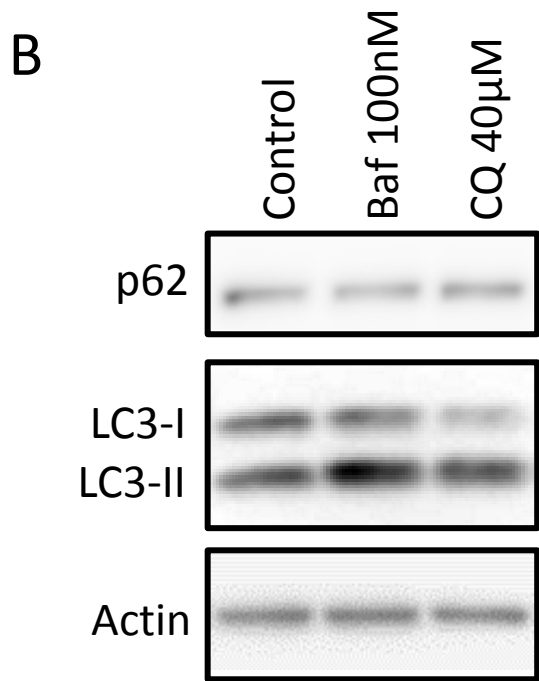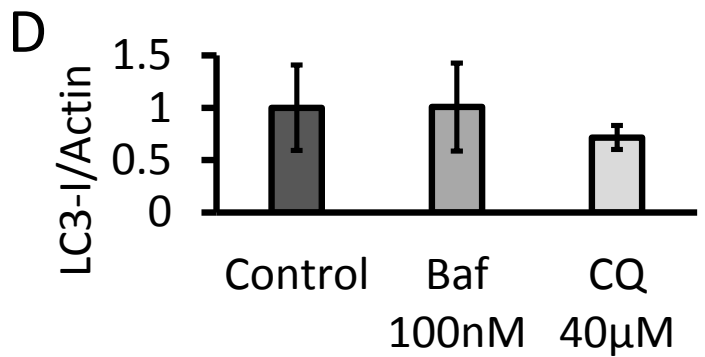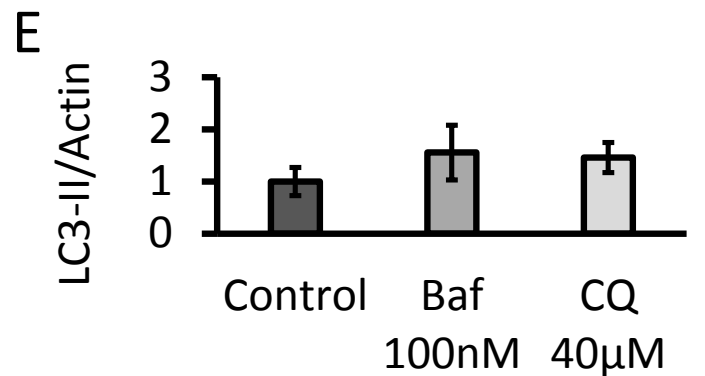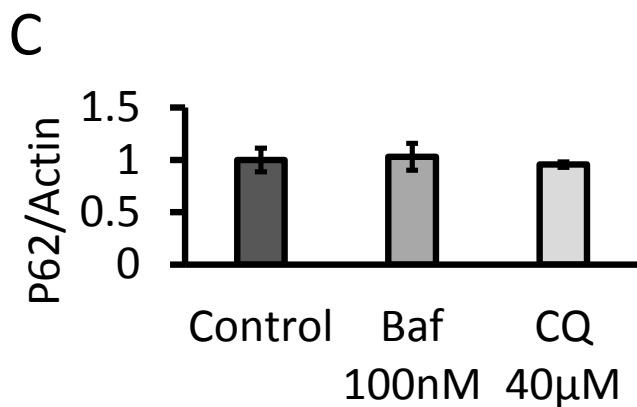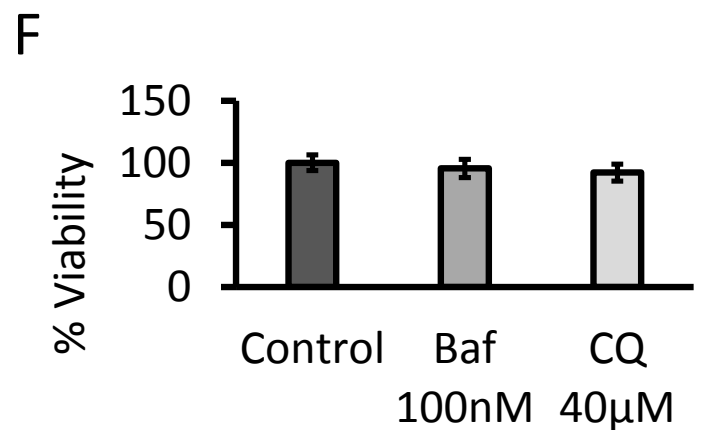

A

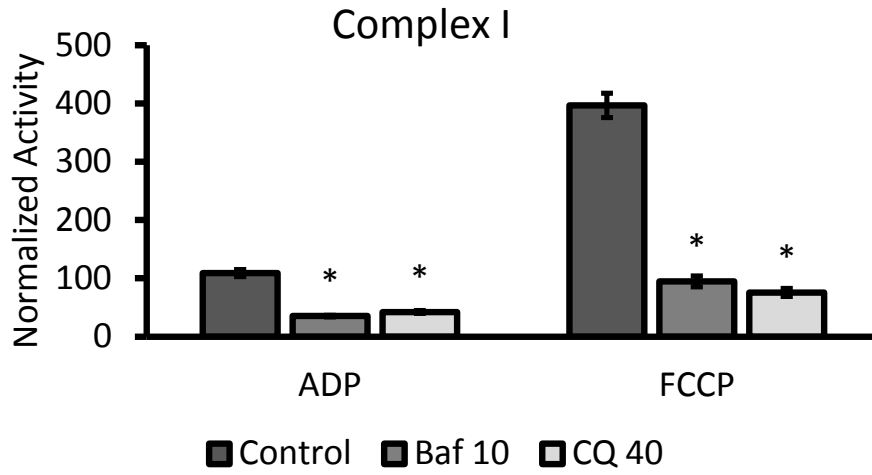

B

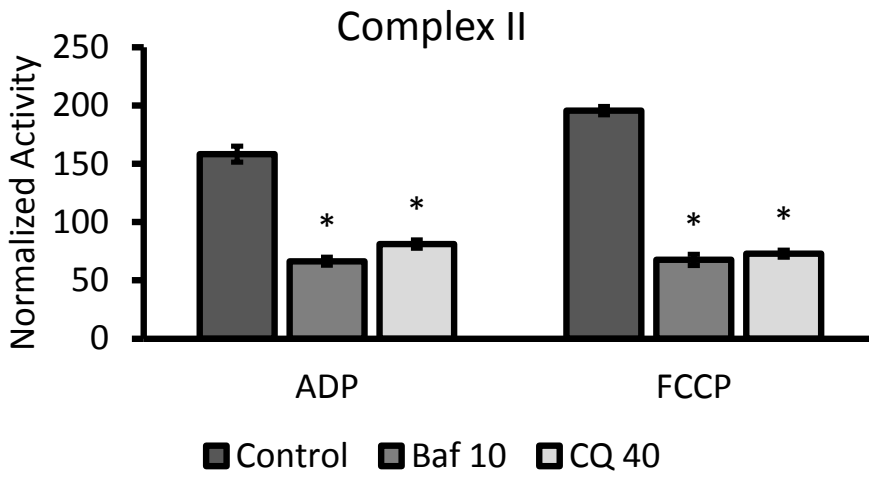

C

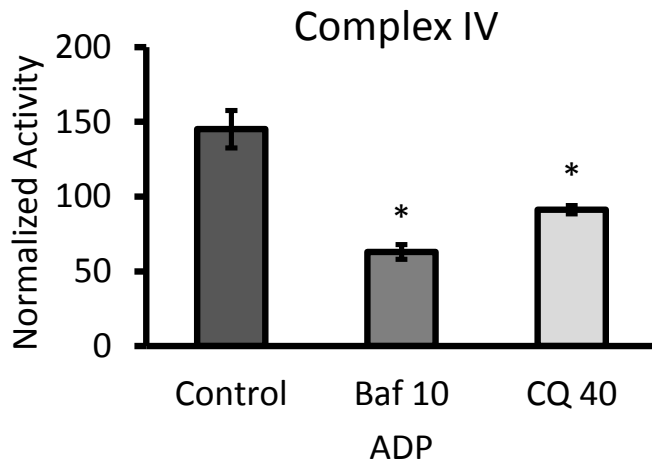

Supplement: mmc1.pdf [file mmc1.pdf]
